# Supplementary material
Source: publisher site journal article supplement (https://www.spandidos-publications.com/912/downloadSupplementary)

Figure S1. lncRNA-mRNA network analysis. The full network includes the differentially expressed lncRNAs (green) and their target mRNAs (blue). lncRNA, long non-coding RNA.

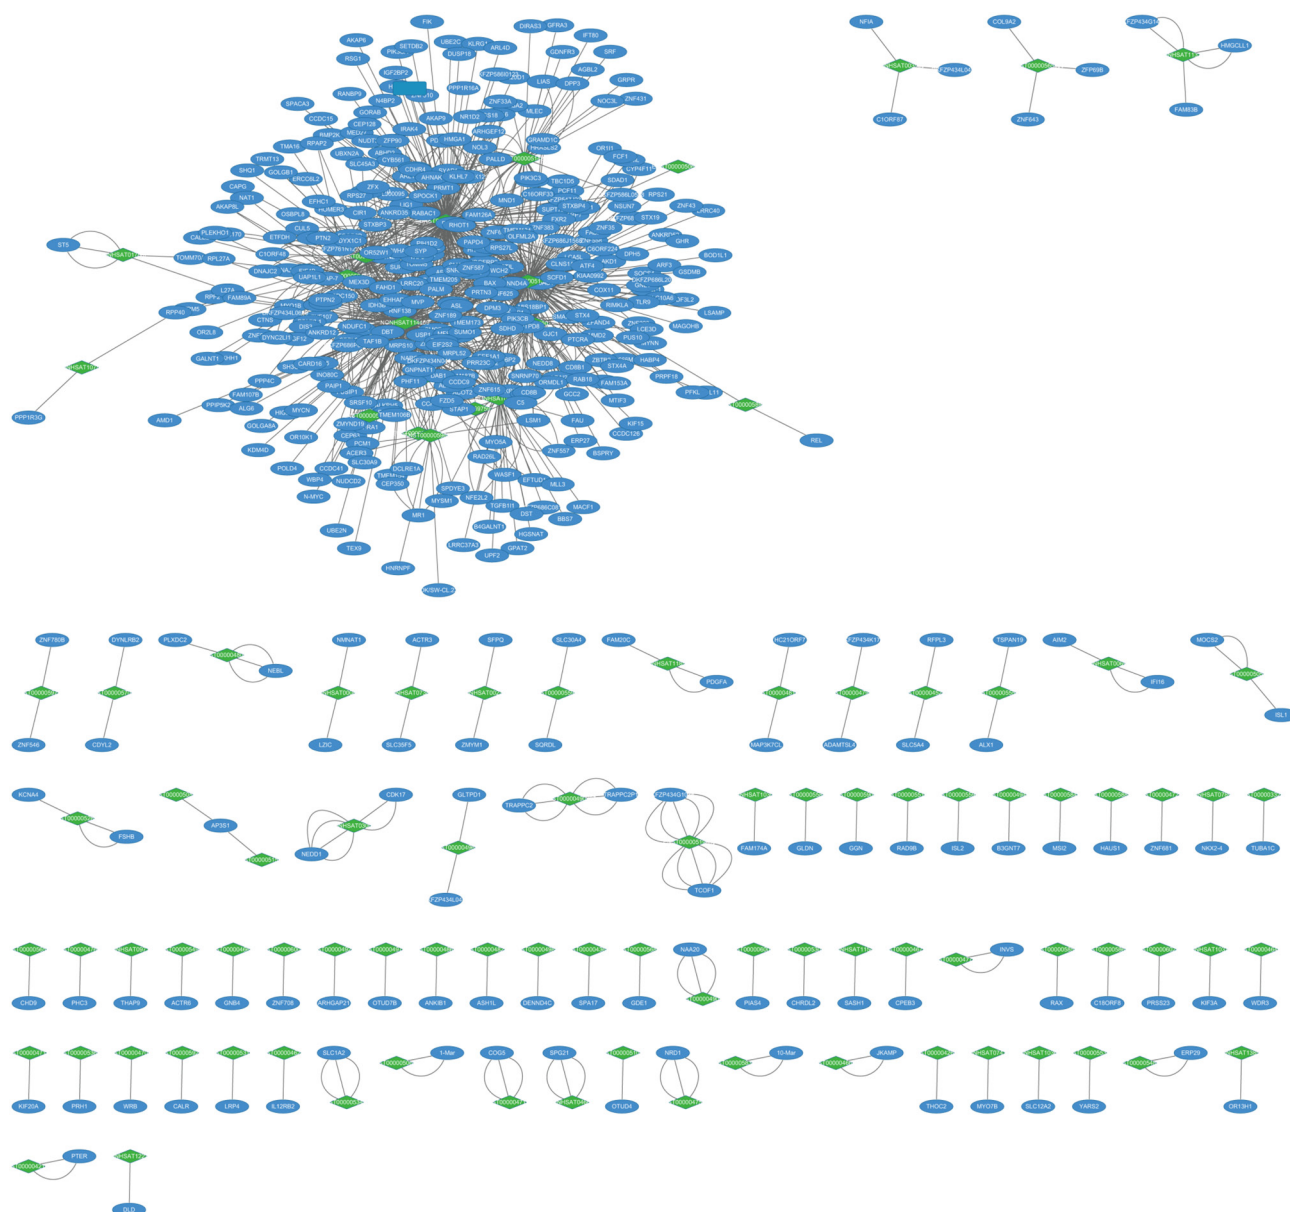

Supplement: Supplementary file 1 [file downloadSupplementary]
